# Supplementary material
Source: PubMed Central journal article supplement (PMC8671561)
Supplement: NIHMS1708688-supplement-Supplemental_Data_File___doc___tif__pdf__etc___2.pdf [file NIHMS1708688-supplement-Supplemental_Data_File___doc___tif__pdf__etc___2.pdf]

# Testosterone ELISA

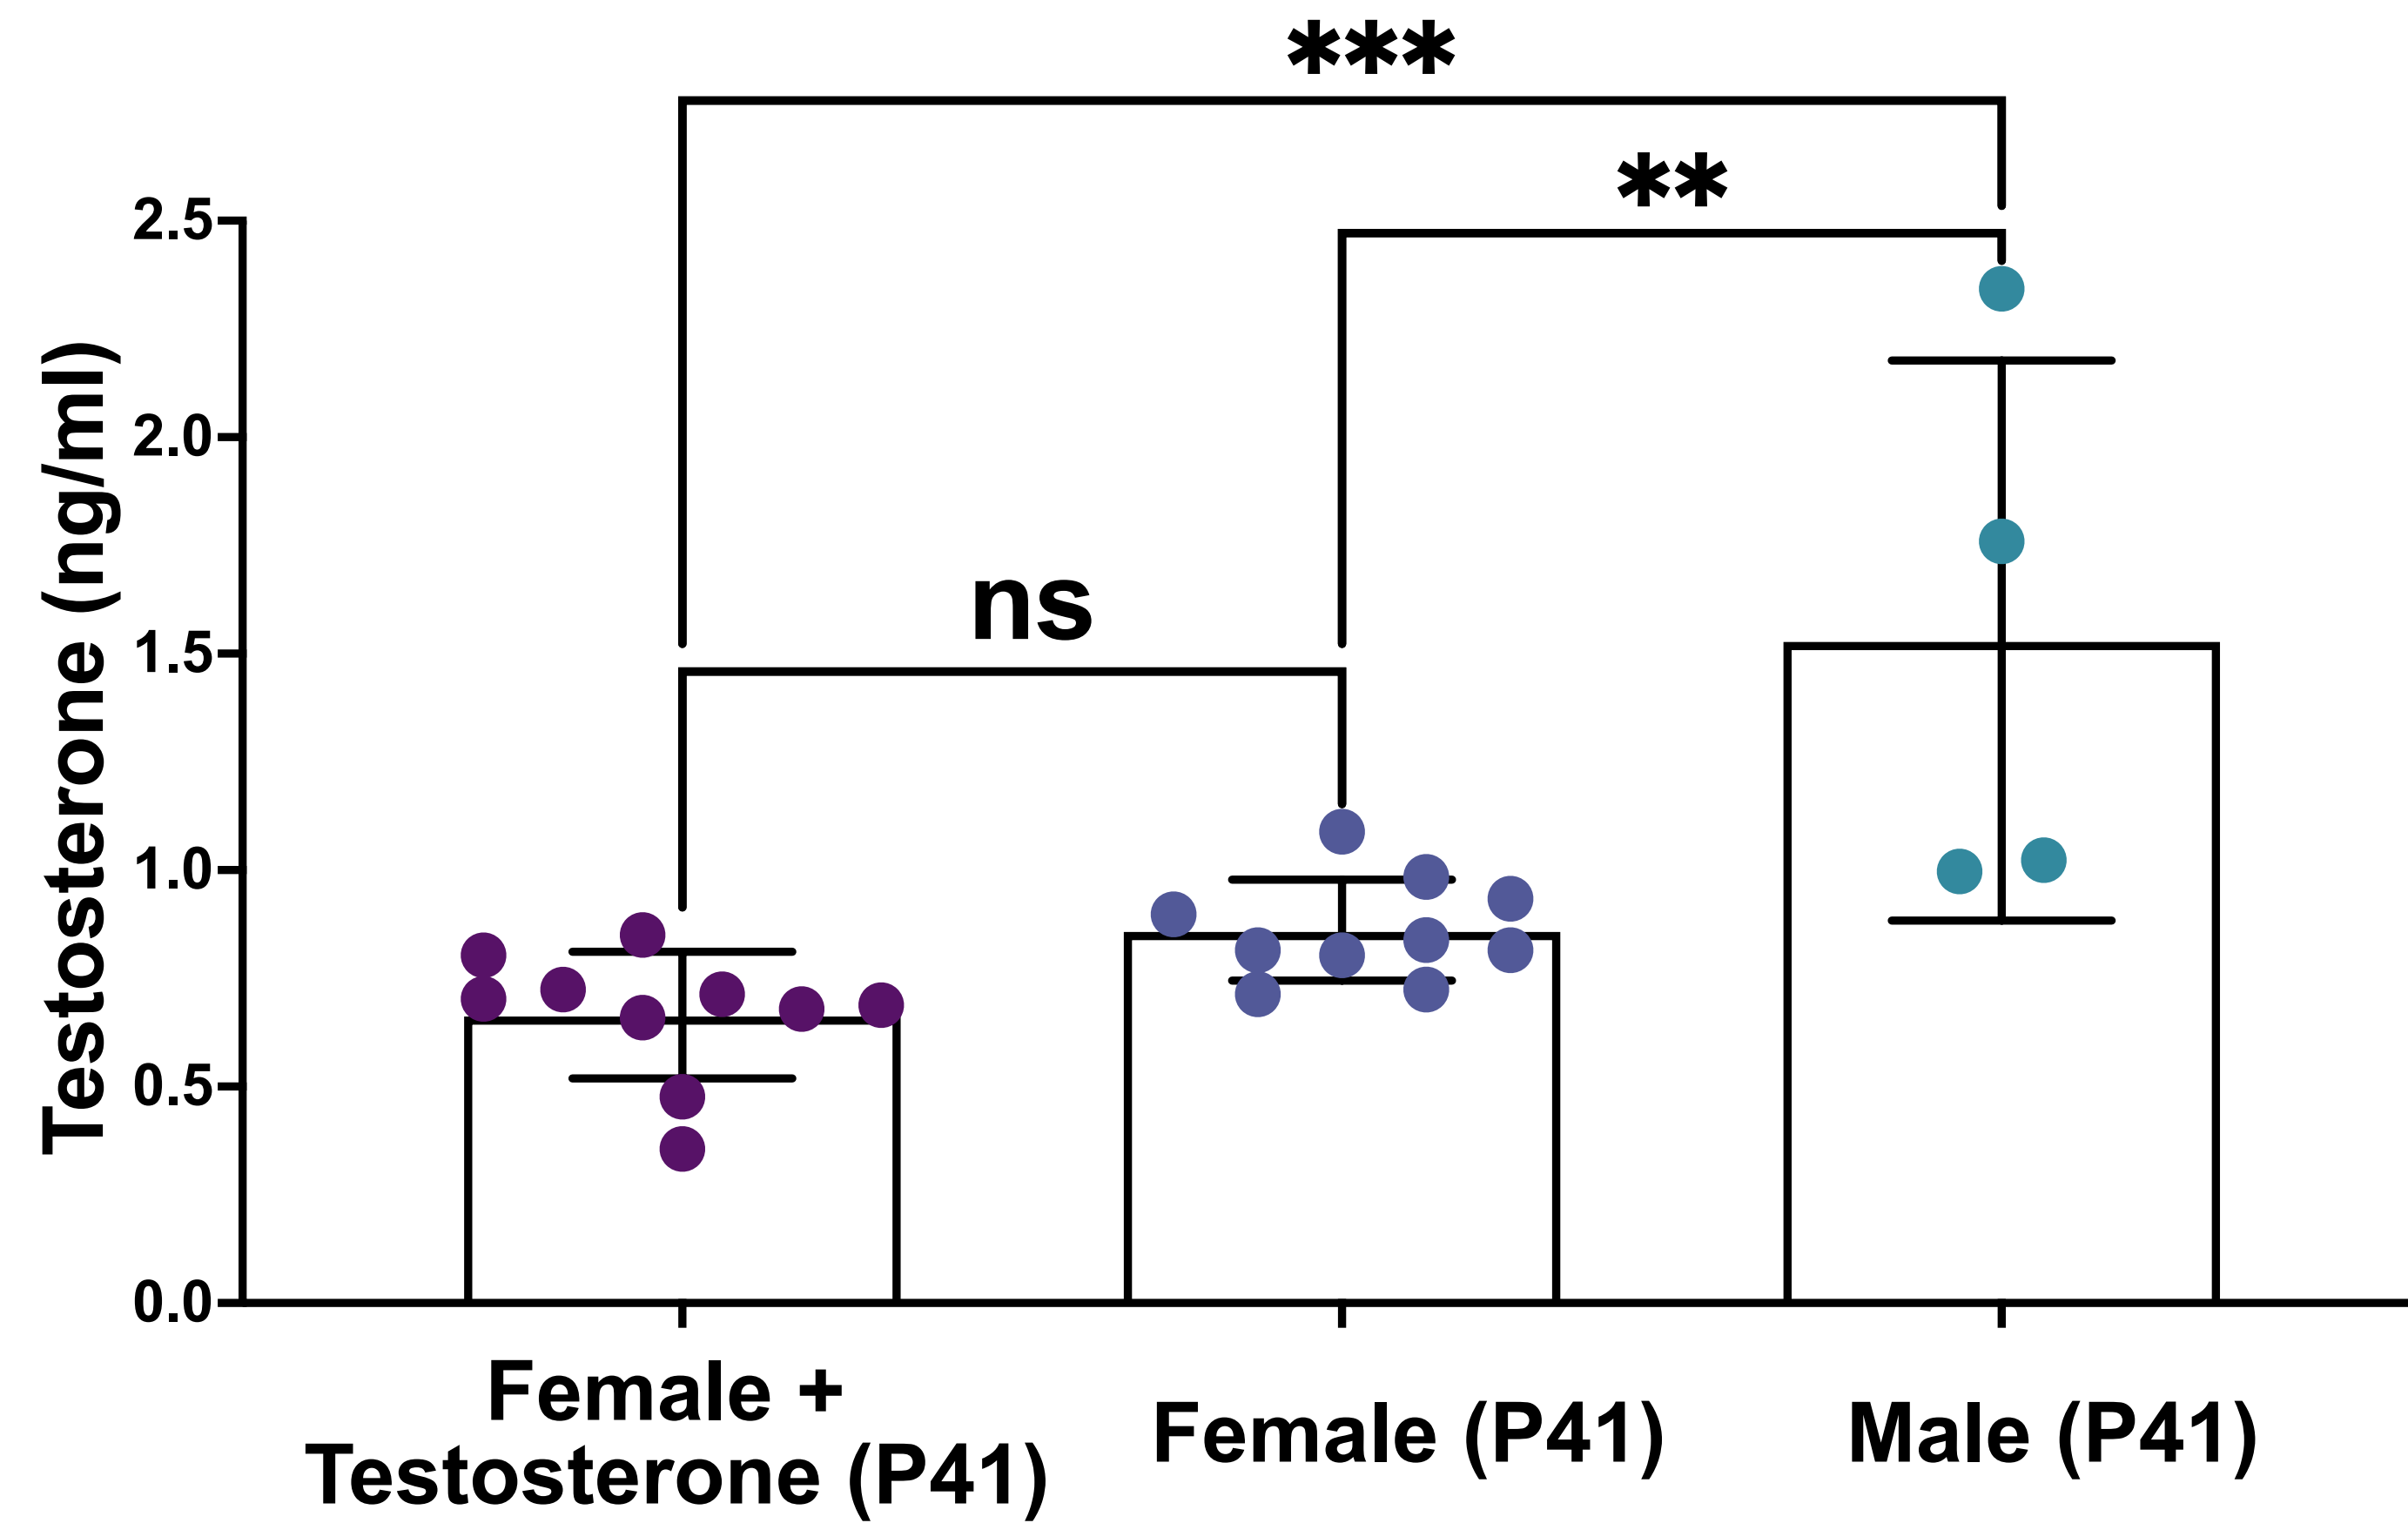

**Supplemental Digital Content 2** Serum testosterone from young adult animals. No difference at postnatal day 41 between Female treated with testosterone on postnatal days 1-6 vs Controls by Sidak's multiple comparison ( $p=0.327$ ). Both Female + Testosterone ( $p<0.001$ ) and Female controls ( $p=0.001$ ) had significantly less testosterone than control Males.
